# Supplementary material
Source: Springer Nature journal article supplement (https://www.springermedizin.de/resource/supplementary/12974_2005_50_MOESM3_ESM.pdf/9600664)

### IL-1 $\beta$ Proximal sections

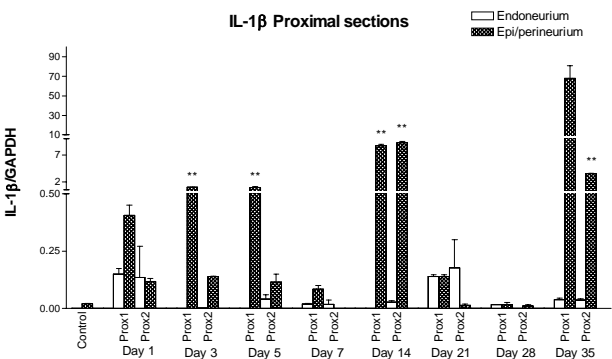

### IL-1 $\beta$ Distal section

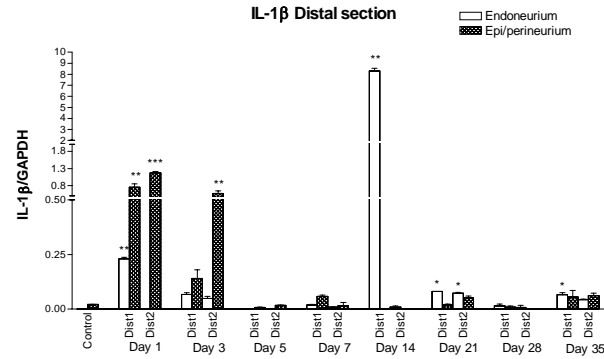

### TNF- $\alpha$ Proximal sections

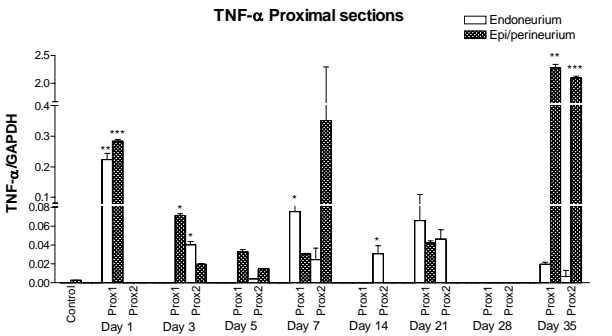

### TNF- $\alpha$ Distal sections

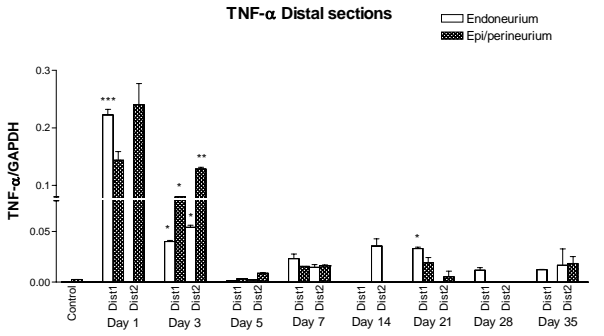

### IL-10 Proximal section

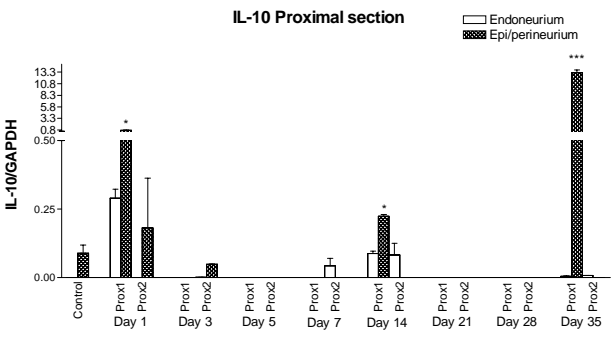

### IL-10 Distal section

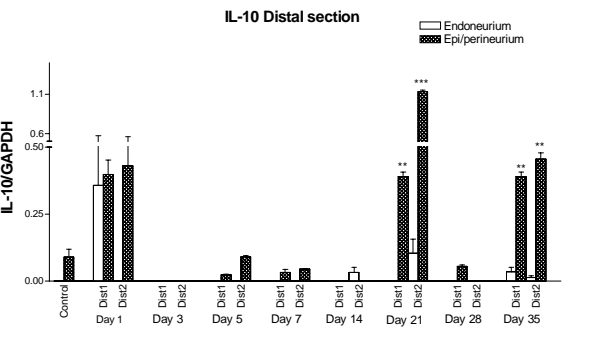

### IFN- $\gamma$ Proximal sections

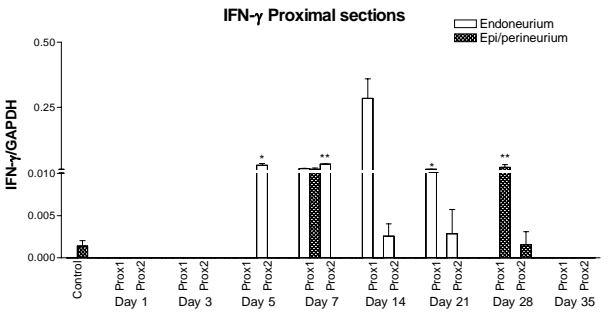

### IFN- $\gamma$ Distal sections

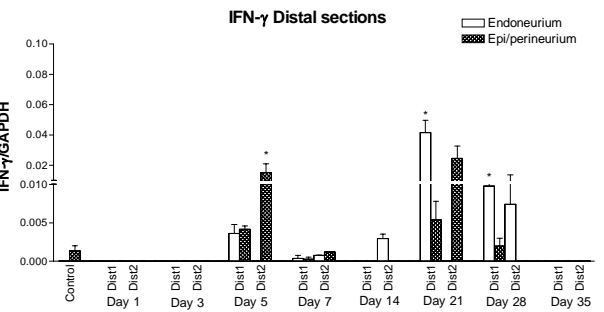

Supplement: MOESM3 [file 9600664]
